# Supplementary material for: Green synthesis of ethyl cinnamates under microwave irradiation: photophysical properties, cytotoxicity, and cell bioimaging
Source: Royal Society of Chemistry journal article supplement (doi:10.1039/d3ra06443c), 2024-01-01
Supplement: d3ra06443c1.pdf [file d3ra06443c1.pdf]

## Electronic Supplementary Information

### Green synthesis of ethyl cinnamates under microwave irradiations: photophysical properties, cytotoxicity, and cell bioimaging

Miguel Angel Aztatzi-Mendoza,<sup>1</sup> Edgar Leonel Porras-Núñez,<sup>1</sup> Verónica M. Rivas-Galindo,<sup>2</sup> Pilar Carranza-Rosales,<sup>3</sup> Irma Edith Carranza-Torres,<sup>3</sup> Catalina García-Vielma,<sup>3</sup> Iran F. Hernández-Ahuactzi,<sup>4</sup> Susana López-Cortina,<sup>1</sup> Israel López,<sup>5\*</sup> Eugenio Hernández-Fernández<sup>1\*</sup>

<sup>1</sup>Universidad Autónoma de Nuevo León, UANL, Facultad de Ciencias Químicas, Pedro de Alba s/n, Ciudad Universitaria, 66450 San Nicolás de los Garza, Nuevo León, Mexico.

<sup>2</sup>Universidad Autónoma de Nuevo León, UANL, Facultad de Medicina, Fco. I. Madero s/n, Mitras Centro, 64460 Monterrey, Nuevo León, Mexico.

<sup>3</sup>Centro de Investigación Biomédica del Noreste, Instituto Mexicano del Seguro Social, Monterrey 64720, Nuevo León, Mexico.

<sup>4</sup>Centro Universitario de Tonalá, Universidad de Guadalajara, Av. Nuevo Periférico 555, Ejido San José Tatepozco, Tonalá 45425, Jalisco, México.

<sup>5</sup>Universidad Autónoma de Nuevo León (UANL), Facultad de Ciencias Químicas, Centro de Investigación en Biotecnología y Nanotecnología, Laboratorio de Nanociencias y Nanotecnología, Autopista al Aeropuerto Internacional Mariano Escobedo Km. 10, Parque de Investigación e Innovación Tecnológica, 66629 Apodaca, Nuevo León, Mexico.

Content:

**Fig S11.** <sup>1</sup>H NMR spectrum (CDCl<sub>3</sub>) of **3a** derivative.

**Fig S12.** <sup>13</sup>C NMR spectrum (CDCl<sub>3</sub>) of **3a** derivative.

**Fig S13.** HRMS spectrum of **3a** derivative.

**Fig S14.** <sup>1</sup>H NMR spectrum (CDCl<sub>3</sub>) of **3b** derivative.

**Fig S15.** <sup>13</sup>C NMR spectrum (CDCl<sub>3</sub>) of **3b** derivative.

**Fig S16.** HRMS spectrum of **3b** derivative.

**Fig S17.** <sup>1</sup>H NMR spectrum (CDCl<sub>3</sub>) of **3c** derivative.

**Fig S18.** <sup>13</sup>C NMR spectrum (CDCl<sub>3</sub>) of **3c** derivative.

**Fig S19.** HRMS spectrum of **3c** derivative.

**Fig S110.** <sup>1</sup>H NMR spectrum (CDCl<sub>3</sub>) of **3d** derivative.

**Fig S111.** <sup>13</sup>C NMR spectrum (CDCl<sub>3</sub>) of **3d** derivative.

**Fig S112.** HRMS spectrum of **3d** derivative.

**Fig S113.** <sup>1</sup>H NMR spectrum (CDCl<sub>3</sub>) of **3e** derivative.

**Fig S114.**  $^{13}\text{C}$  NMR spectrum ( $\text{CDCl}_3$ ) of **3e** derivative.

**Fig S115.** HRMS spectrum of **3e** derivative.

**Fig S116.**  $^1\text{H}$  NMR spectrum ( $\text{CDCl}_3$ ) of **3f** derivative.

**Fig S117.**  $^{13}\text{C}$  NMR spectrum ( $\text{CDCl}_3$ ) of **3f** derivative.

**Fig S118.** HRMS spectrum of **3f** derivative.

**Fig S119.** Coordinates of the compounds **3a-f** represented in the CIE map 1931.

**Fig S120.** Pictures of compounds a) **3a** and b) **3b** in different solvents were taken under a 365 nm UV lamp.

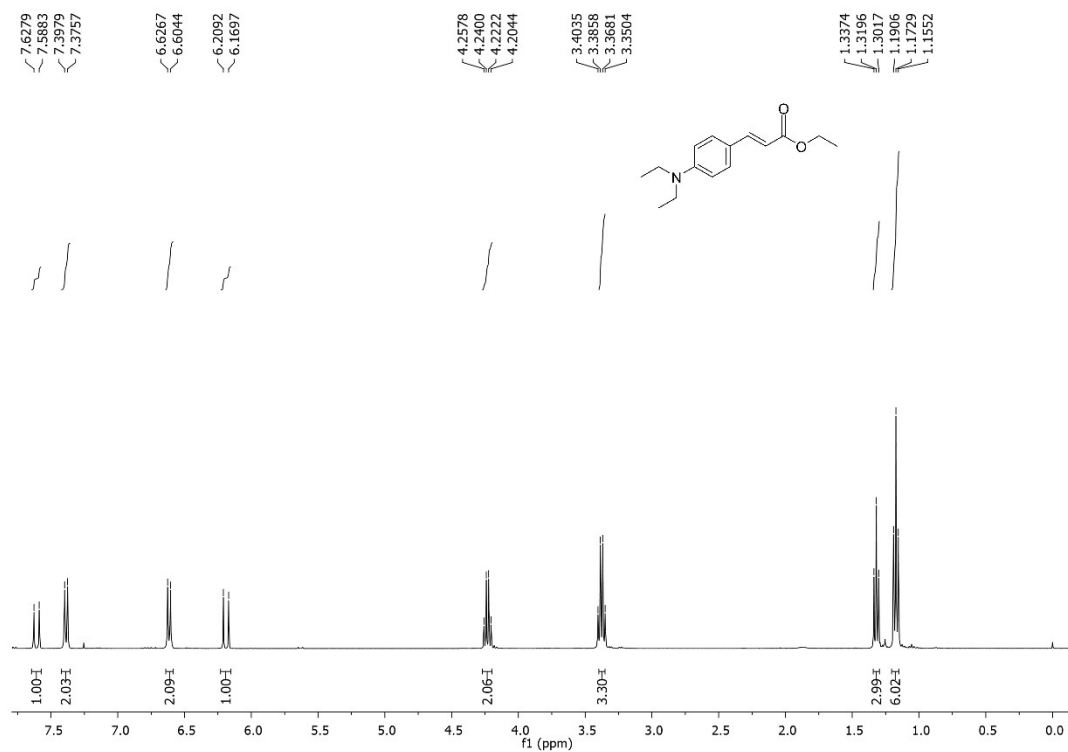

**Fig S11.**  $^1\text{H}$  NMR spectrum ( $\text{CDCl}_3$ ) of **3a** derivative.

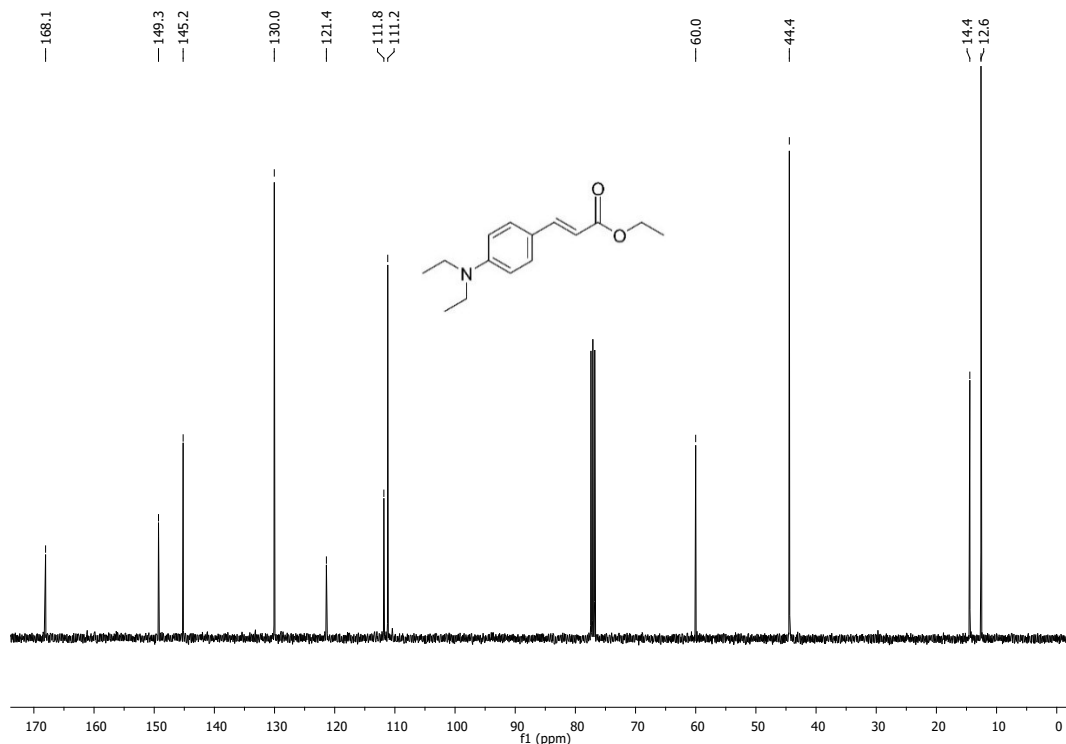

**Fig S12.**  $^{13}\text{C}$  NMR spectrum ( $\text{CDCl}_3$ ) of **3a** derivative.

Data:322 MEHF-48  
 Sample Name:Dr Martinez Roberto/ Operador:Carmen Garcia-Javier Perez  
 Description:  
 Ionization Mode:ESI+  
 History:Determine m/z[Peak Detect[Centroid,50,Area];Correct Base[50.0%];Correct Base[5.0%];Average(MS[1] 1..1)  
 Acquired:2/7/2017 8:39:16 AM  
 Operator:AccuTOF  
 Mass Calibration data:Cal Peg 600  
 Created:2/7/2017 4:35:19 PM  
 Created by:AccuTOF

Charge number:1  
 Element: $^{12}\text{C}$ :0 .. 24,  $^1\text{H}$ :1 .. 30,  $^{14}\text{N}$ :1 .. 1,  $^{16}\text{O}$ :0 .. 2  
 Tolerance:20.00(mmu)  
 Unsaturation Number:1.0 .. 30.0 (Fraction:Both)

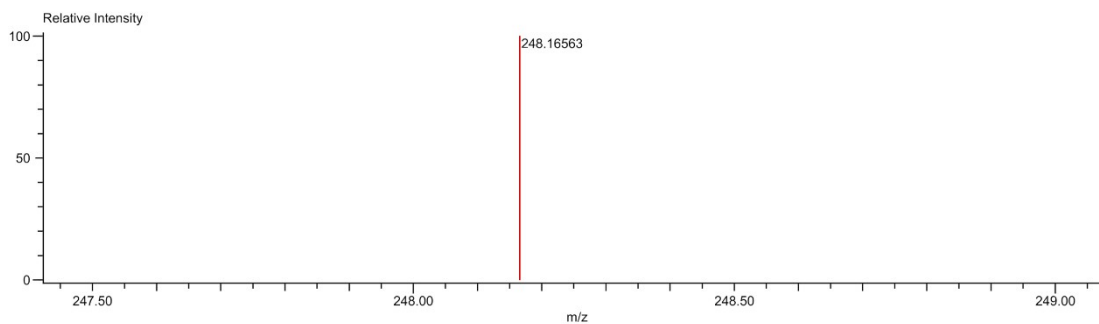

| Mass      | Intensity | Calc. Mass | Mass Difference (mmu) | Mass Difference (ppm) | Possible Formula                                      | Unsaturation Number |
|-----------|-----------|------------|-----------------------|-----------------------|-------------------------------------------------------|---------------------|
| 248.16563 | 711487.30 | 248.16505  | 0.57                  | 2.31                  | $^{12}\text{C}_{15}\text{H}_{22}\text{N}_1\text{O}_2$ | 5.5                 |

**Fig S13.** HRMS spectrum of **3a** derivative.

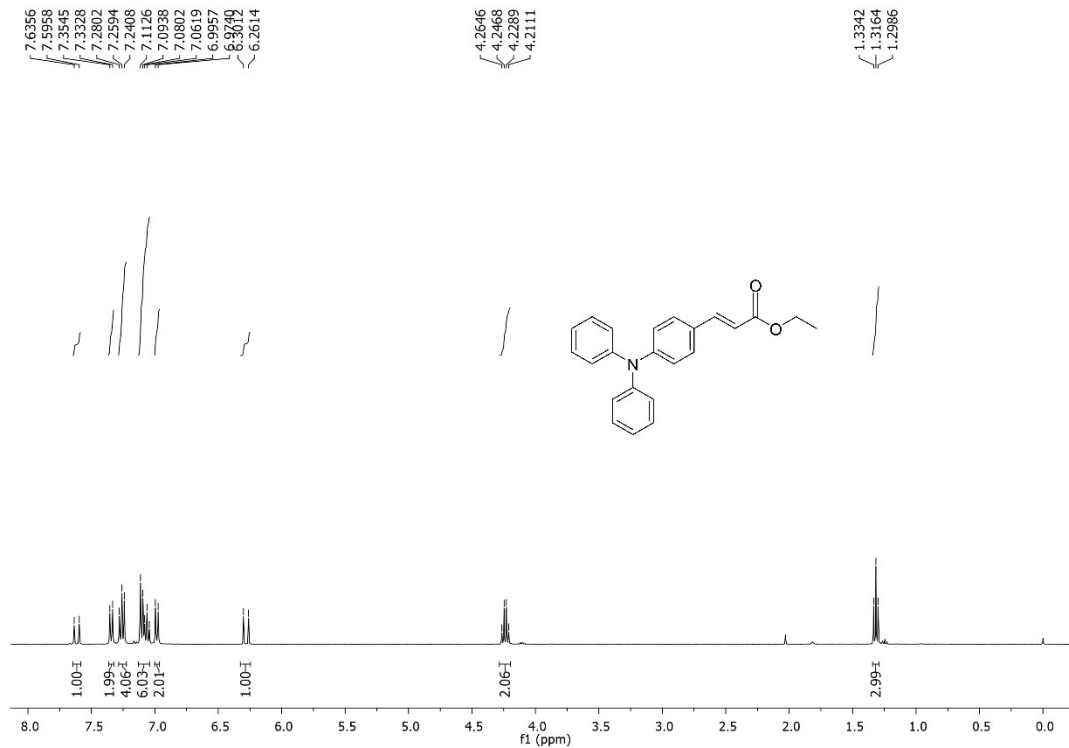

Fig S14. <sup>1</sup>H NMR spectrum (CDCl<sub>3</sub>) of **3b** derivative.

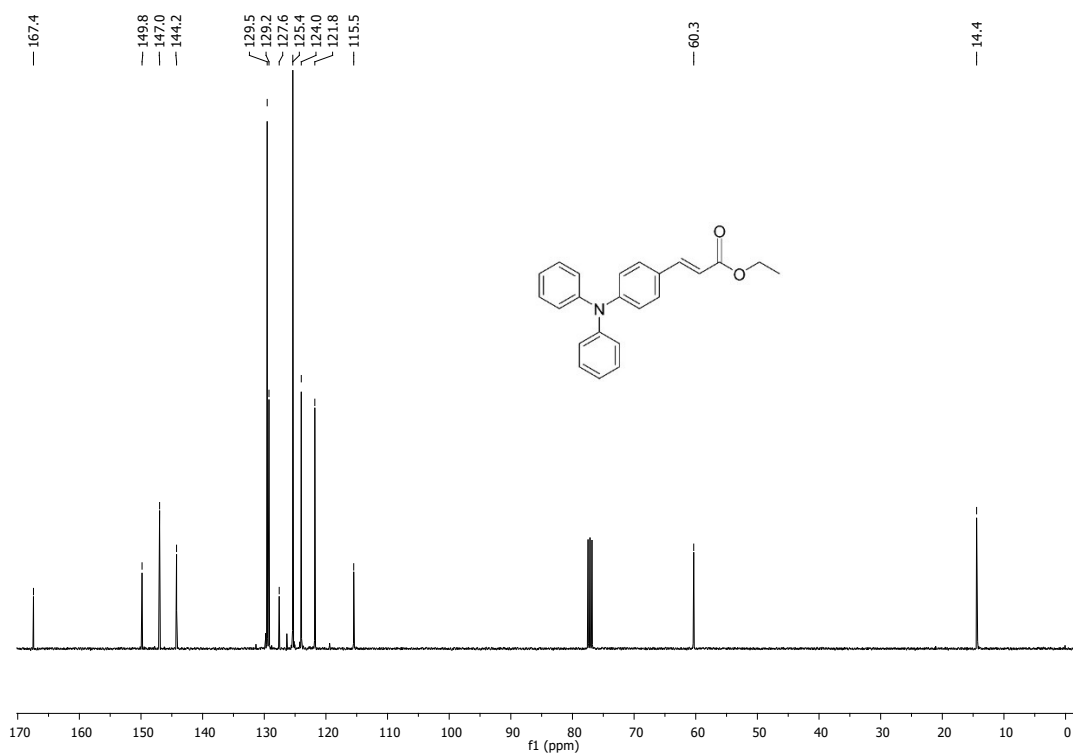

Fig S15. <sup>13</sup>C NMR spectrum (CDCl<sub>3</sub>) of **3b** derivative.

Data:321 MEHF-47-  
Sample Name:Dr Martinez Roberto/Operator:Carmen Garcia-Javier Perez  
Description:  
Ionization Mode:ESI+  
History:Determine m/z[Peak Detect[Centroid,50,Area];Correct Base[50.0%]];Correct Base[50.0%];Average(MS[1] 1..1)

Acquired:2/9/2017 8:01:25 AM  
Operator:AccuTOF  
Mass Calibration data:Cal Peg 600  
Created:2/9/2017 11:02:14 AM  
Created by:AccuTOF

Charge number:1  
Element:<sup>12</sup>C:1 .. 30, <sup>1</sup>H:1 .. 50, <sup>14</sup>N:1 .. 2, <sup>16</sup>O:2 .. 4  
Tolerance:3.00(mmu)

Unsaturation Number:1.0 .. 30.0 (Fraction:Both)

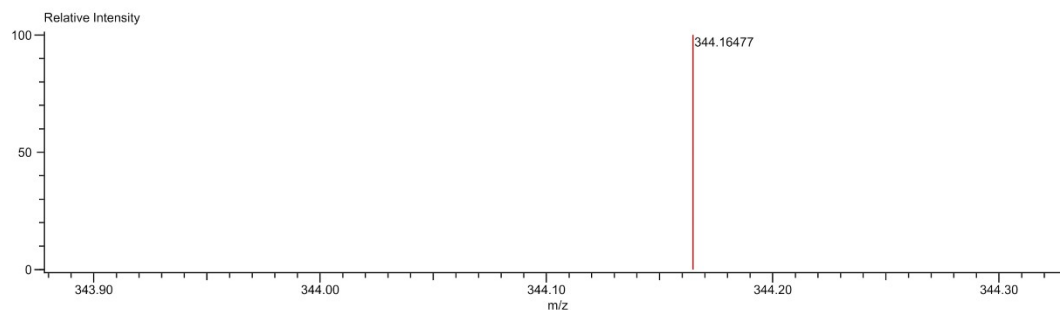

| Mass      | Intensity | Calc. Mass | Mass Difference (mmu) | Mass Difference (ppm) | Possible Formula                                                                                                     | Unsaturation Number |
|-----------|-----------|------------|-----------------------|-----------------------|----------------------------------------------------------------------------------------------------------------------|---------------------|
| 344.16477 | 451692.30 | 344.16505  | -0.28                 | -0.83                 | <sup>12</sup> C <sub>23</sub> <sup>1</sup> H <sub>22</sub> <sup>14</sup> N <sub>1</sub> <sup>16</sup> O <sub>2</sub> | 13.5                |

Fig S16. HRMS spectrum of **3b** derivative.

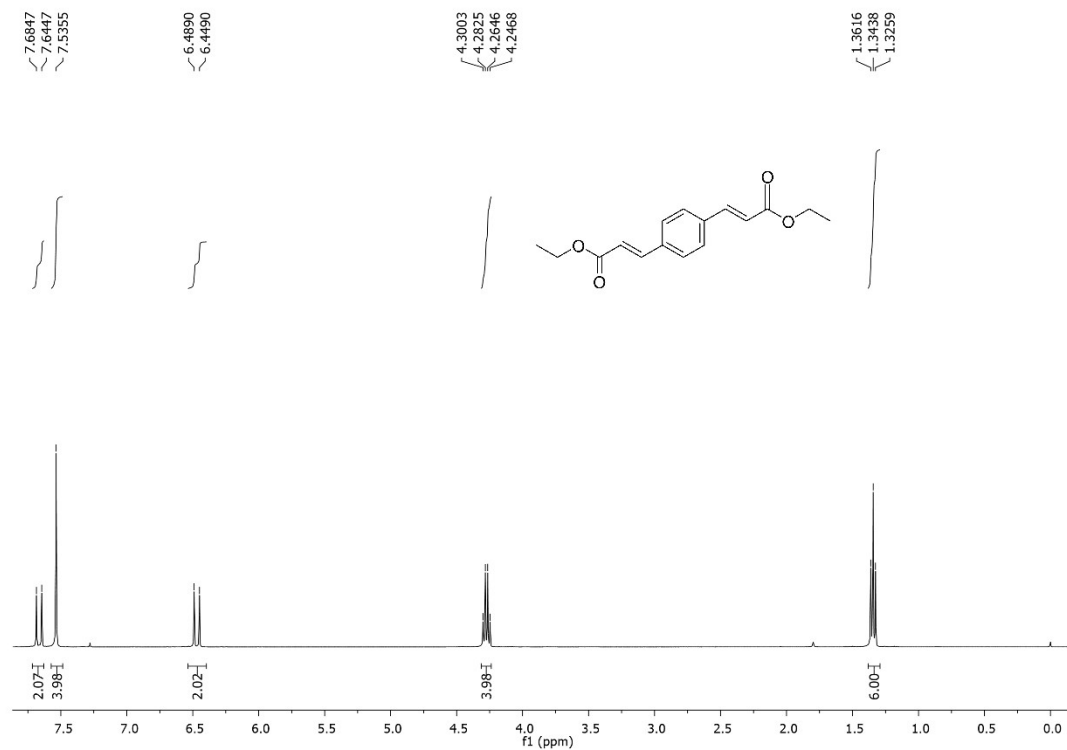

Fig S17. <sup>1</sup>H NMR spectrum (CDCl<sub>3</sub>) of **3c** derivative.

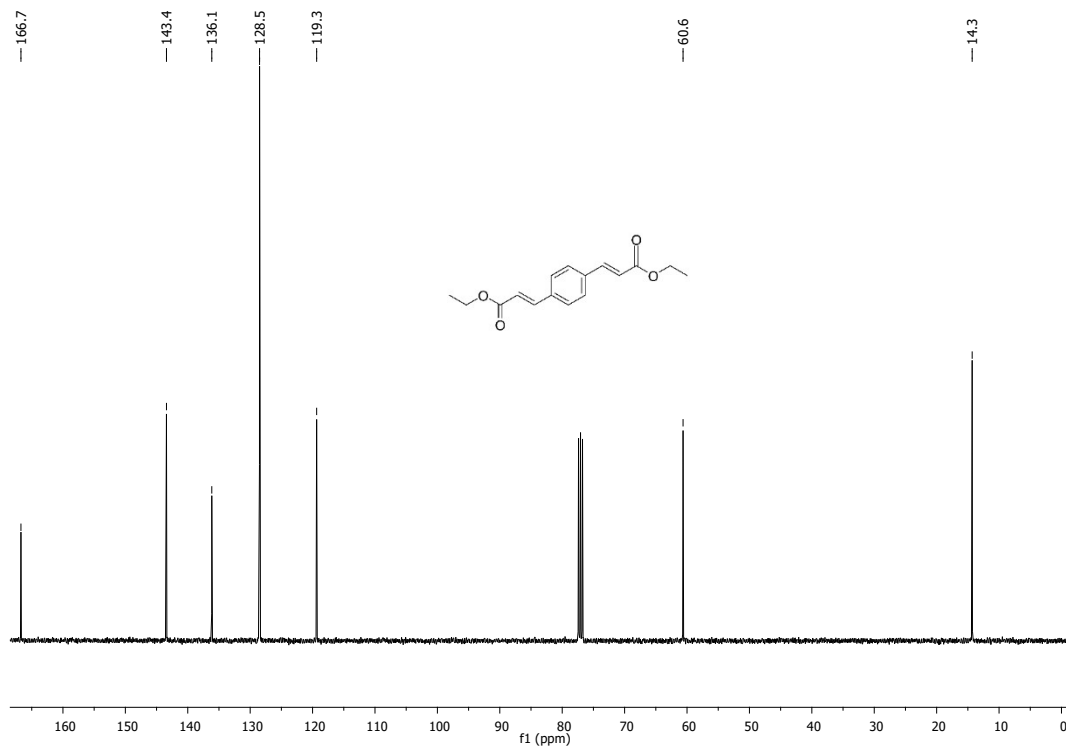

**Fig S18.**  $^{13}\text{C}$  NMR spectrum ( $\text{CDCl}_3$ ) of **3c** derivative.

Data:323 MEHF-49  
 Sample Name:Dr Martinez Roberto/ Operator:Carmen Garcia-Javier Perez  
 Description:  
 Ionization Mode:ESI+  
 History:Determine m/z[Peak Detect[Centroid,50,Area];Correct Base[50.0%]];Correct Base[5.0%];Average[MS[1] 1..1)

Acquired:2/7/2017 8:41:35 AM  
 Operator:AccuTOF  
 Mass Calibration data:Cal Peg 600  
 Created:2/7/2017 4:51:59 PM  
 Created by:AccuTOF

Charge number:1  
 Element: $^{12}\text{C}$ :0 .. 24,  $^1\text{H}$ :1 .. 30,  $^{16}\text{O}$ :0 .. 4  
 Tolerance:5.00(mmu)  
 Unsaturation Number:1.0 .. 30.0 (Fraction:Both)

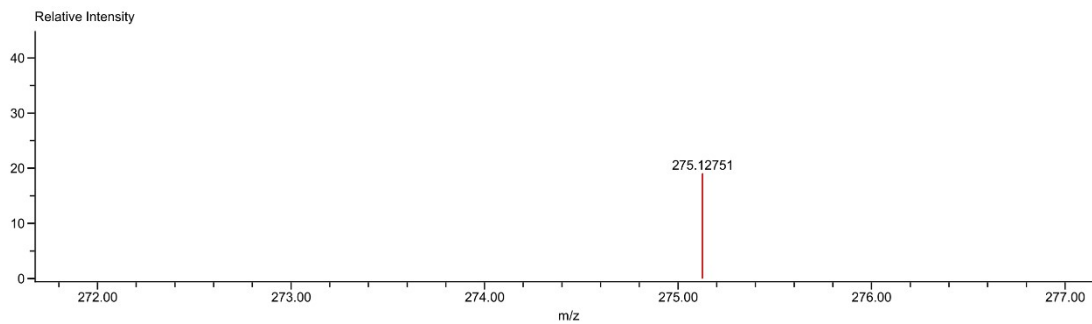

| Mass      | Intensity | Calc. Mass | Mass Difference (mmu) | Mass Difference (ppm) | Possible Formula                                   | Unsaturation Number |
|-----------|-----------|------------|-----------------------|-----------------------|----------------------------------------------------|---------------------|
| 275.12751 | 23245.29  | 275.12833  | -0.82                 | -3.00                 | $^{12}\text{C}_{16}^1\text{H}_{19}^{16}\text{O}_4$ | 7.5                 |

**Fig S19.** HRMS spectrum of **3c** derivative.

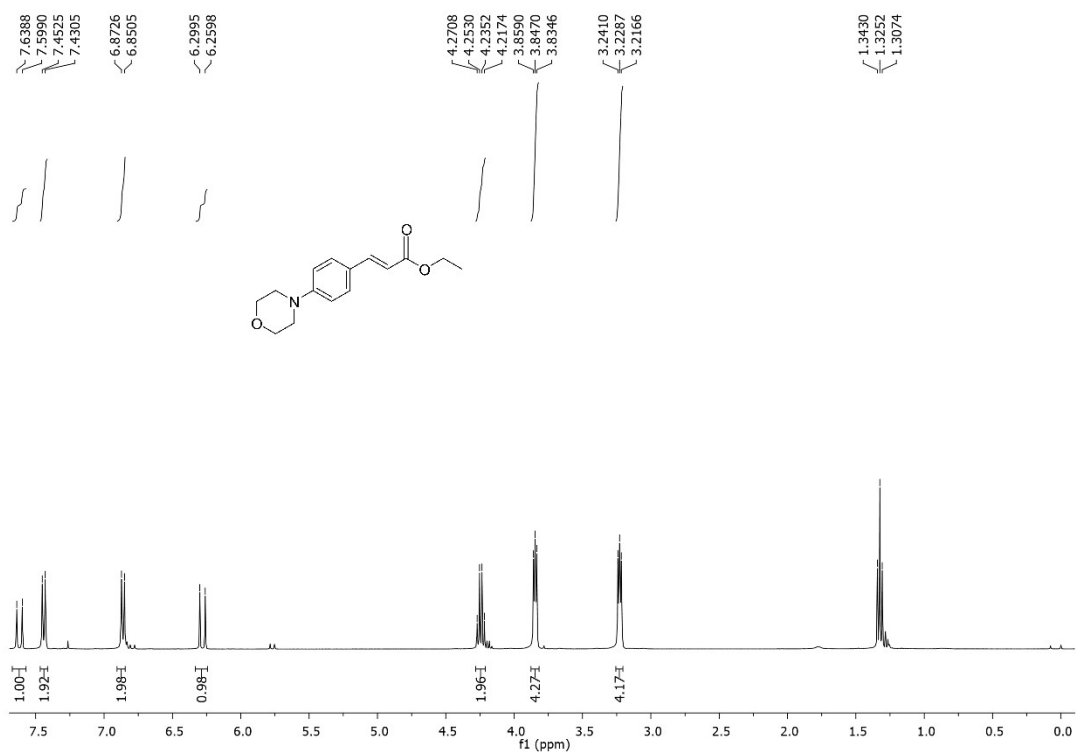

**Fig SI10.** <sup>1</sup>H NMR spectrum (CDCl<sub>3</sub>) of **3d** derivative.

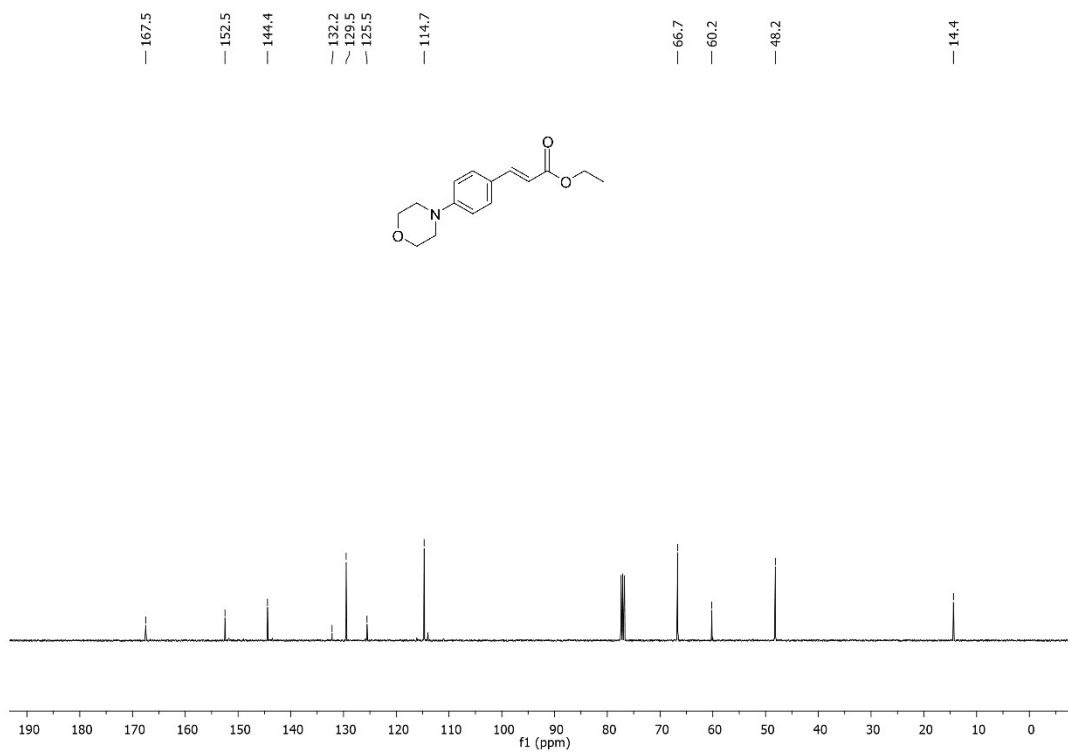

**Fig SI11.** <sup>13</sup>C NMR spectrum (CDCl<sub>3</sub>) of **3d** derivative.

Data:324 MEHF-50

Sample Name:Dr Martinez Roberto/ Operador:Carmen Garcia-Javier Perez

Description:

Ionization Mode:ESI+

History:Determine m/z[Peak Detect[Centroid,50,Area];Correct Base[50.0%];Correct Base[5.0%];Average(MS[1] 1..1)

Acquired:2/7/2017 8:43:33 AM

Operator:AccuTOF

Mass Calibration data:Cal Peg 600

Created:2/7/2017 4:55:06 PM

Created by:AccuTOF

Charge number:1

Tolerance:5.00(mmu)

Unsaturation Number:1.0 .. 30.0 (Fraction:Both)

Element:<sup>12</sup>C:0 .. 24, <sup>1</sup>H:1 .. 30, <sup>14</sup>N:1 .. 1, <sup>16</sup>O:0 .. 4

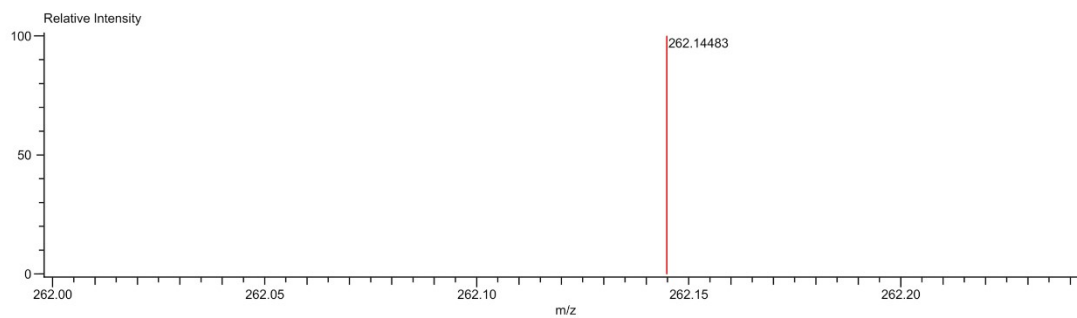

| Mass      | Intensity  | Calc. Mass | Mass Difference (mmu) | Mass Difference (ppm) | Possible Formula                                                                                                     | Unsaturation Number |
|-----------|------------|------------|-----------------------|-----------------------|----------------------------------------------------------------------------------------------------------------------|---------------------|
| 262.14483 | 1312356.45 | 262.14432  | 0.51                  | 1.94                  | <sup>12</sup> C <sub>15</sub> <sup>1</sup> H <sub>20</sub> <sup>14</sup> N <sub>1</sub> <sup>16</sup> O <sub>3</sub> | 6.5                 |

Fig SI12. HRMS spectrum of 3d derivative.

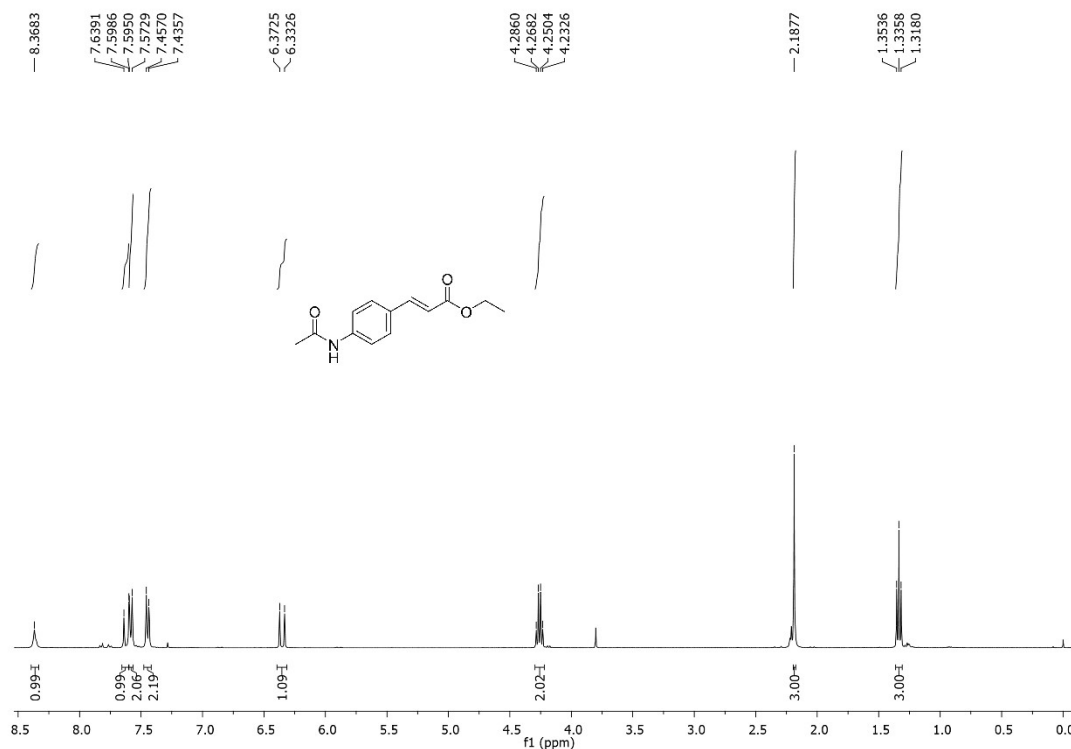

Fig SI13. <sup>1</sup>H NMR spectrum (CDCl<sub>3</sub>) of 3e derivative.



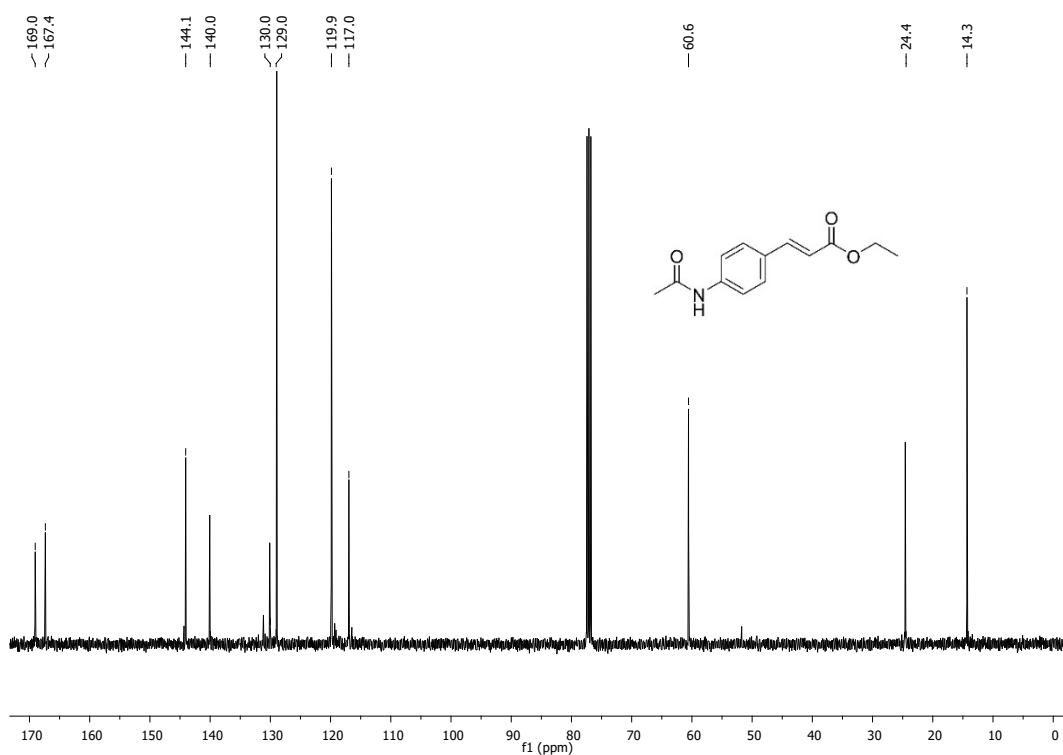

Fig S114.  $^{13}\text{C}$  NMR spectrum ( $\text{CDCl}_3$ ) of **3e** derivative.

+ Scan (rt: 0.071-0.221 min)

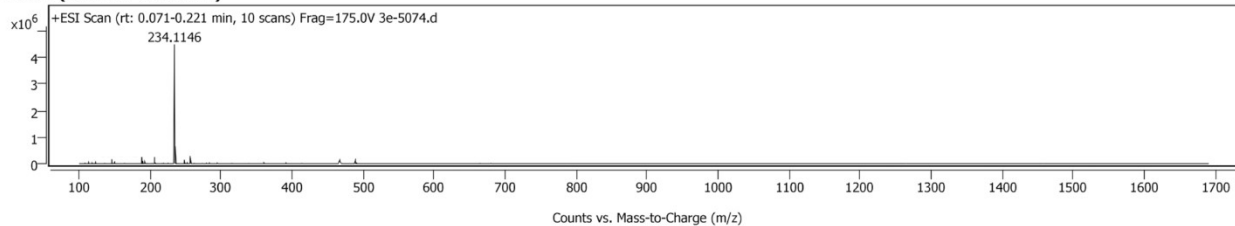

Fig S115. HRMS spectrum of **3e** derivative.

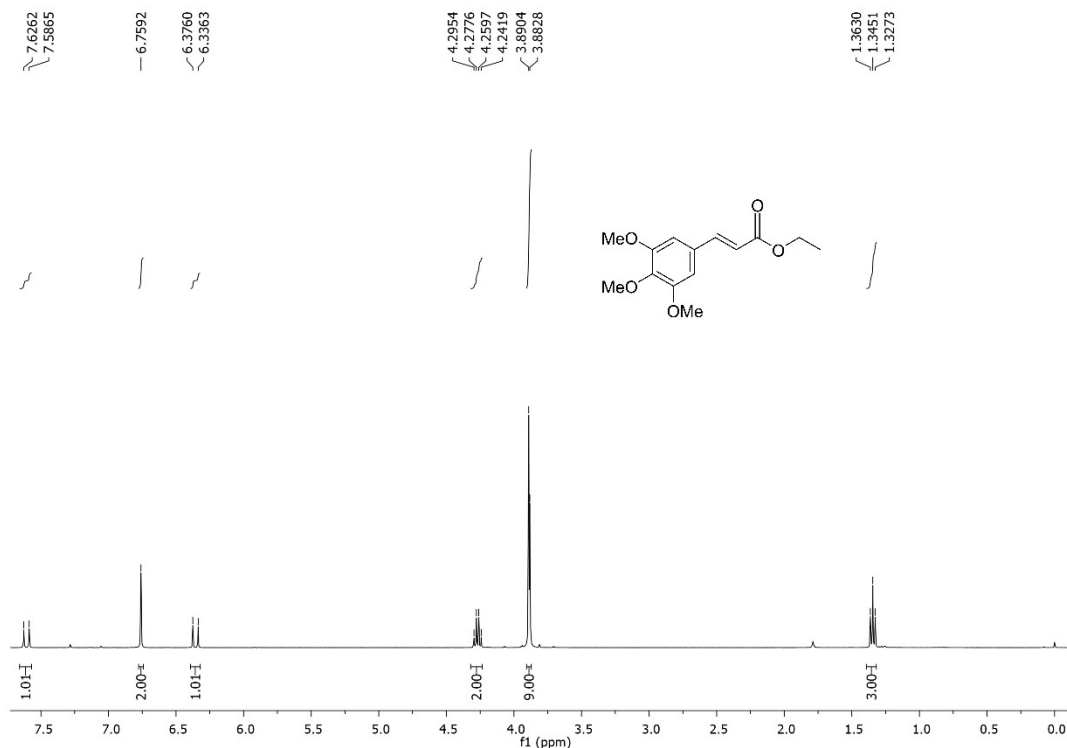

Fig SI16.  $^1\text{H}$  NMR spectrum ( $\text{CDCl}_3$ ) of **3f** derivative.

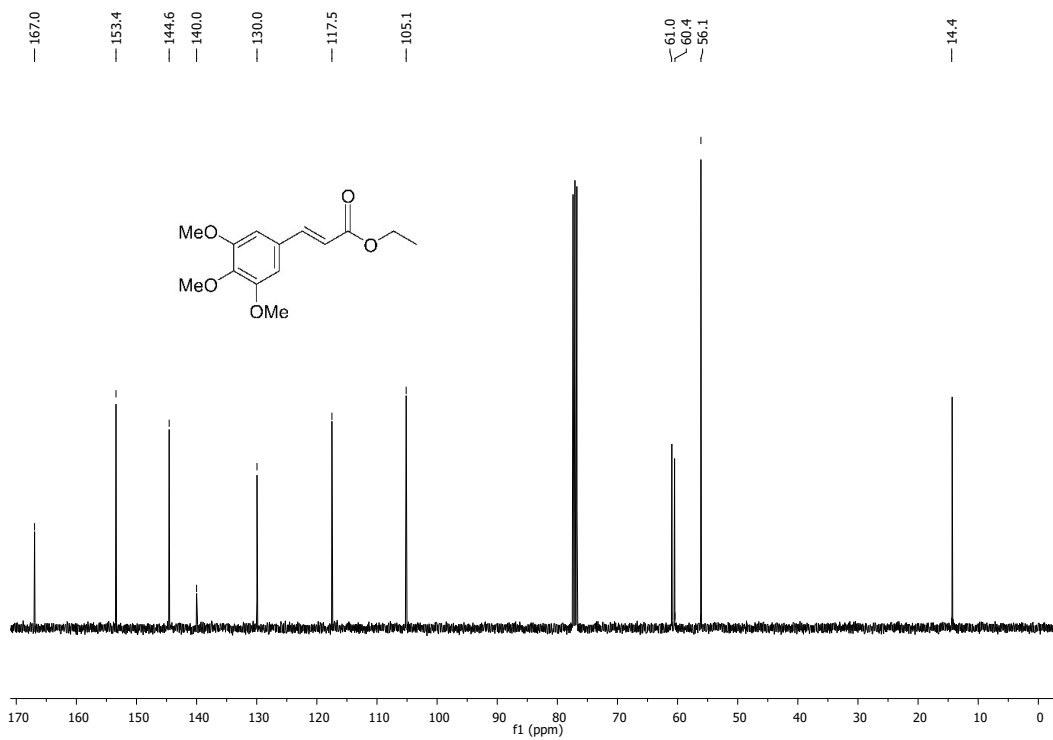

Fig SI17.  $^{13}\text{C}$  NMR spectrum ( $\text{CDCl}_3$ ) of **3f** derivative.

Data:325 MEHF-51  
Sample Name:Dr Martinez Roberto/ Operador:Carmen Garcia-Javier Perez  
Description:  
Ionization Mode:ESI+  
History:Determine m/z[Peak Detect[Centroid,50,Area];Correct Base[50.0%]];Correct Base[5.0%];Average(MS[1] 1..1)

Acquired:2/7/2017 8:45:44 AM  
Operator:AccuTOF  
Mass Calibration data:Cal Peg 600  
Created:2/7/2017 4:58:05 PM  
Created by:AccuTOF

Charge number:1  
Element:<sup>12</sup>C:0 .. 24, <sup>1</sup>H:1 .. 30, <sup>16</sup>O:0 .. 5  
Tolerance:5.00(mmu)  
Unsaturation Number:1.0 .. 30.0 (Fraction:Both)

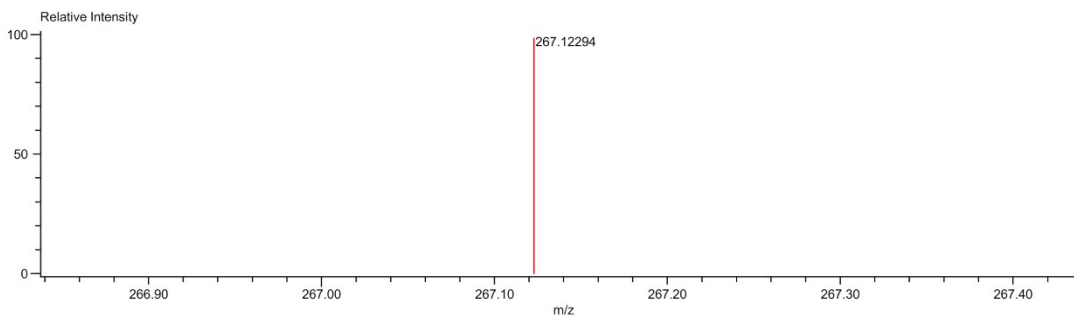

| Mass      | Intensity | Calc. Mass | Mass Difference (mmu) | Mass Difference (ppm) | Possible Formula                                                                        | Unsaturation Number |
|-----------|-----------|------------|-----------------------|-----------------------|-----------------------------------------------------------------------------------------|---------------------|
| 267.12294 | 392453.81 | 267.12325  | -0.31                 | -1.15                 | <sup>12</sup> C <sub>14</sub> <sup>1</sup> H <sub>19</sub> <sup>16</sup> O <sub>5</sub> | 5.5                 |

**Fig S118.** HRMS spectrum of **3f** derivative.

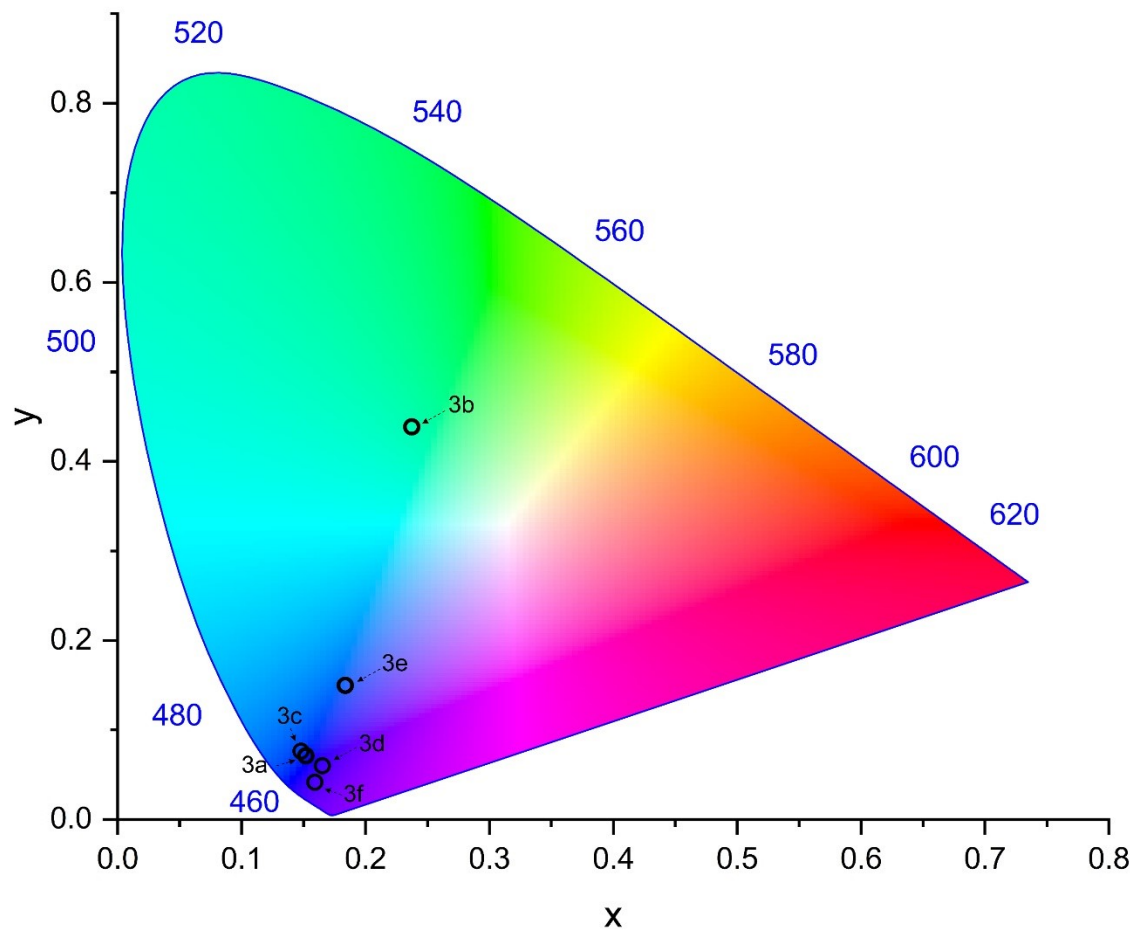

**Fig SI19.** Coordinates of the compounds **3a-f** represented in the CIE map 1931.

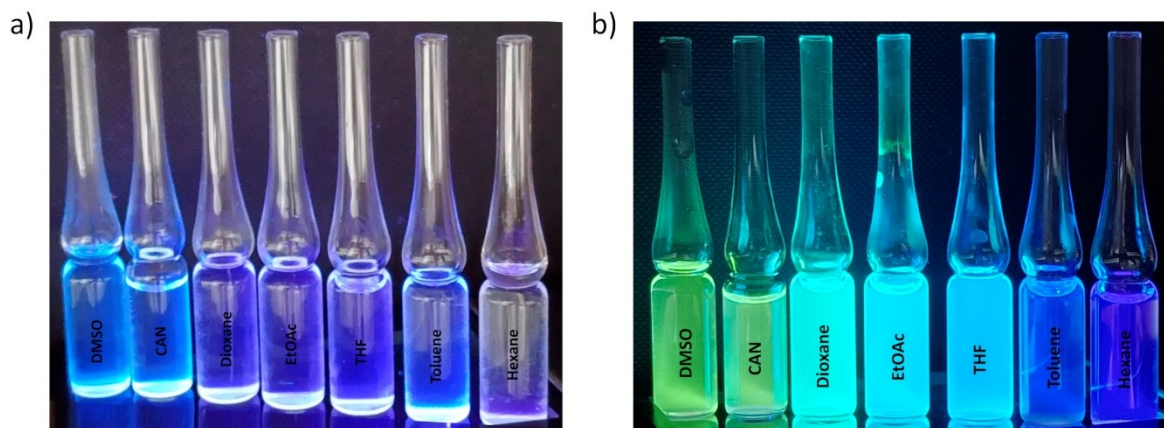

**Fig SI20.** Pictures of compounds a) **3a** and b) **3b** in different solvents were taken under a 365 nm UV lamp.
